# Supplementary material for: Biodegradable asparagine–graphene oxide free chlorine sensors fabricated using solution-based processing
Source: Royal Society of Chemistry journal article supplement (doi:10.1039/d2an00533f), 2022-01-01
Supplement: d2an00533f1.pdf [file d2an00533f1.pdf]

## Electronic Supplementary Information

### Biodegradable asparagine-graphene oxide free chlorine sensors fabricated using solution-based processing

Junaid Siddiqui, M. Jamal Deen

Electrical and Computer Engineering (ECE) Department

McMaster University, 1280 Main Street W, Hamilton, Ontario L8S 4K1 Canada (jamal@mcmaster.ca)

**Keywords:** biocompatible, graphene oxide, free chlorine, water quality monitoring, solution-based fabrication, sensors

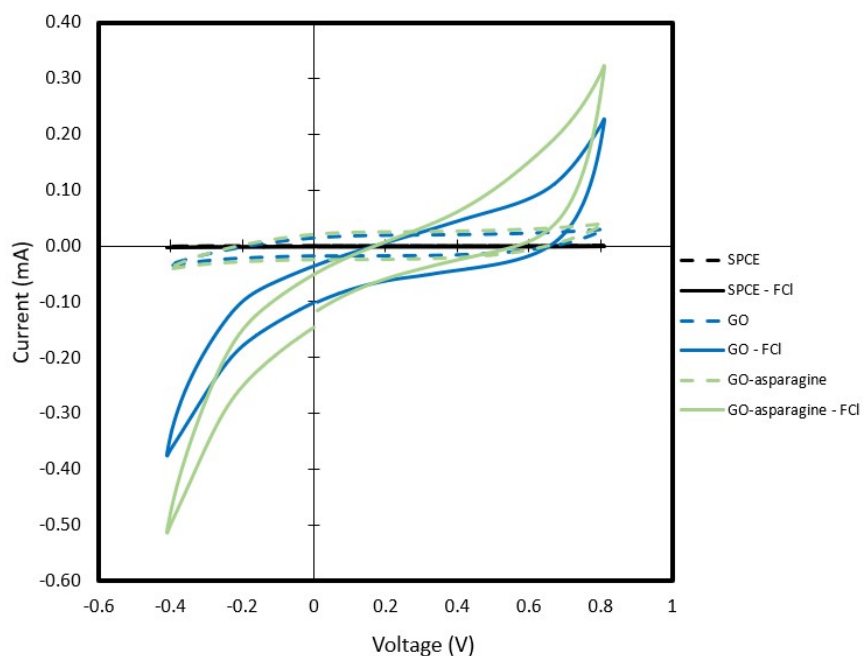

**Fig. S1:** Voltammetric Behavior of SPCE (black), SPCE/GO (blue), SPCE/GO-asparagine (green) where the dashed lines represent the absence of free chlorine and solid lines represent the addition of ~220 ppm free chlorine.
